# Supplementary material for: Label-Free Quantification Mass Spectrometry Identifies Protein Markers of Chemotherapy Response in High-Grade Serous Ovarian Cancer
Source: MDPI journal article supplement (doi:10.3390/cancers15072172), 2023-04-06
Supplement: s1 [file s1]

Supplementary Table S1: Clinicopathological information for the patients used for the construction of TMA

| Patient | First treatment                    | Grade | Category                         | Age at diagnosis [years] |
|---------|------------------------------------|-------|----------------------------------|--------------------------|
| 1       | Carboplatin / Paclitaxel           | 3     | Complete Response                | 54                       |
| 2       | Carboplatin                        | 3     | Complete Response                | 79                       |
| 3       | Carboplatin / Paclitaxel           | 3     | Complete Response                | 63                       |
| 4       | Carboplatin / Paclitaxel           | 3     | Complete Response                | 76                       |
| 5       | Carboplatin/Paclitaxel             | 3     | Complete Response                | 74                       |
| 6       | Carboplatin/Paclitaxel             | 3     | Complete Response                | 59                       |
| 7       | Carboplatin/Paclitaxel             | 3     | Complete Response                | 69                       |
| 8       | Carboplatin                        | 3     | Complete Response                | 69                       |
| 9       | Carboplatin/Paclitaxel             | 3     | Complete Response                | 61                       |
| 10      | Carboplatin/Paclitaxel             | 3     | Complete Response                | 43                       |
| 11      | Carboplatin                        | 3     | Complete Response                | 82                       |
| 12      | Carboplatin/Paclitaxel             | 3     | Complete Response                | 49                       |
| 13      | Carboplatin/Paclitaxel             | 3     | Complete Response                | 46                       |
| 14      | Carboplatin/Paclitaxel             | 3     | Complete Response                | 51                       |
| 15      | Carboplatin/Paclitaxel             | 3     | Complete Response                | 37                       |
| 16      | Carboplatin/Paclitaxel             | 3     | Complete Response                | 64                       |
| 17      | Carboplatin                        | 3     | Complete Response                | 60                       |
| 18      | Carboplatin/Paclitaxel             | 3     | Complete Response                | 59                       |
| 19      | Carboplatin                        | 3     | Complete Response                | 75                       |
| 20      | Carboplatin/Paclitaxel             | 2     | Complete Response                | 59                       |
| 21      | Carboplatin                        | 3     | Complete Response                | 50                       |
| 22      | Carboplatin/Paclitaxel             | 3     | Non-response/incomplete Response | 78                       |
| 23      | Carboplatin / Paclitaxel / Avastin | 3     | Non-response/incomplete Response | 66                       |
| 24      | Carboplatin/Paclitaxel             | 4     | Non-response/incomplete Response | 75                       |
| 25      | Carboplatin/Paclitaxel             | 3     | Non-response/incomplete Response | 61                       |
| 26      | Carboplatin/Paclitaxel             | 3     | Non-response/incomplete Response | 62                       |
| 27      | Carboplatin/Paclitaxel             | 3     | Non-response/incomplete Response | 44                       |
| 28      | Carboplatin/Paclitaxel             | 3     | Non-response/incomplete Response | 75                       |
| 29      | Carboplatin                        | 3     | Non-response/incomplete Response | 78                       |
| 30      | Carboplatin                        | 3     | Unknown Response                 | 79                       |
| 31      | Carboplatin/Paclitaxel             | 3     | Unknown Response                 | 60                       |
